# Supplementary material for: Anion recognition and redox sensing by a metalloporphyrin–ferrocene–alkylammonium conjugate
Source: Royal Society of Chemistry journal article supplement (doi:10.1039/b411870g), 2004-01-01

Figure 1: HMQCgpqf of **2**,  $1.8 \cdot 10^{-2}$  M in  $\text{CDCl}_3$ , 298 K, 400 MHz.

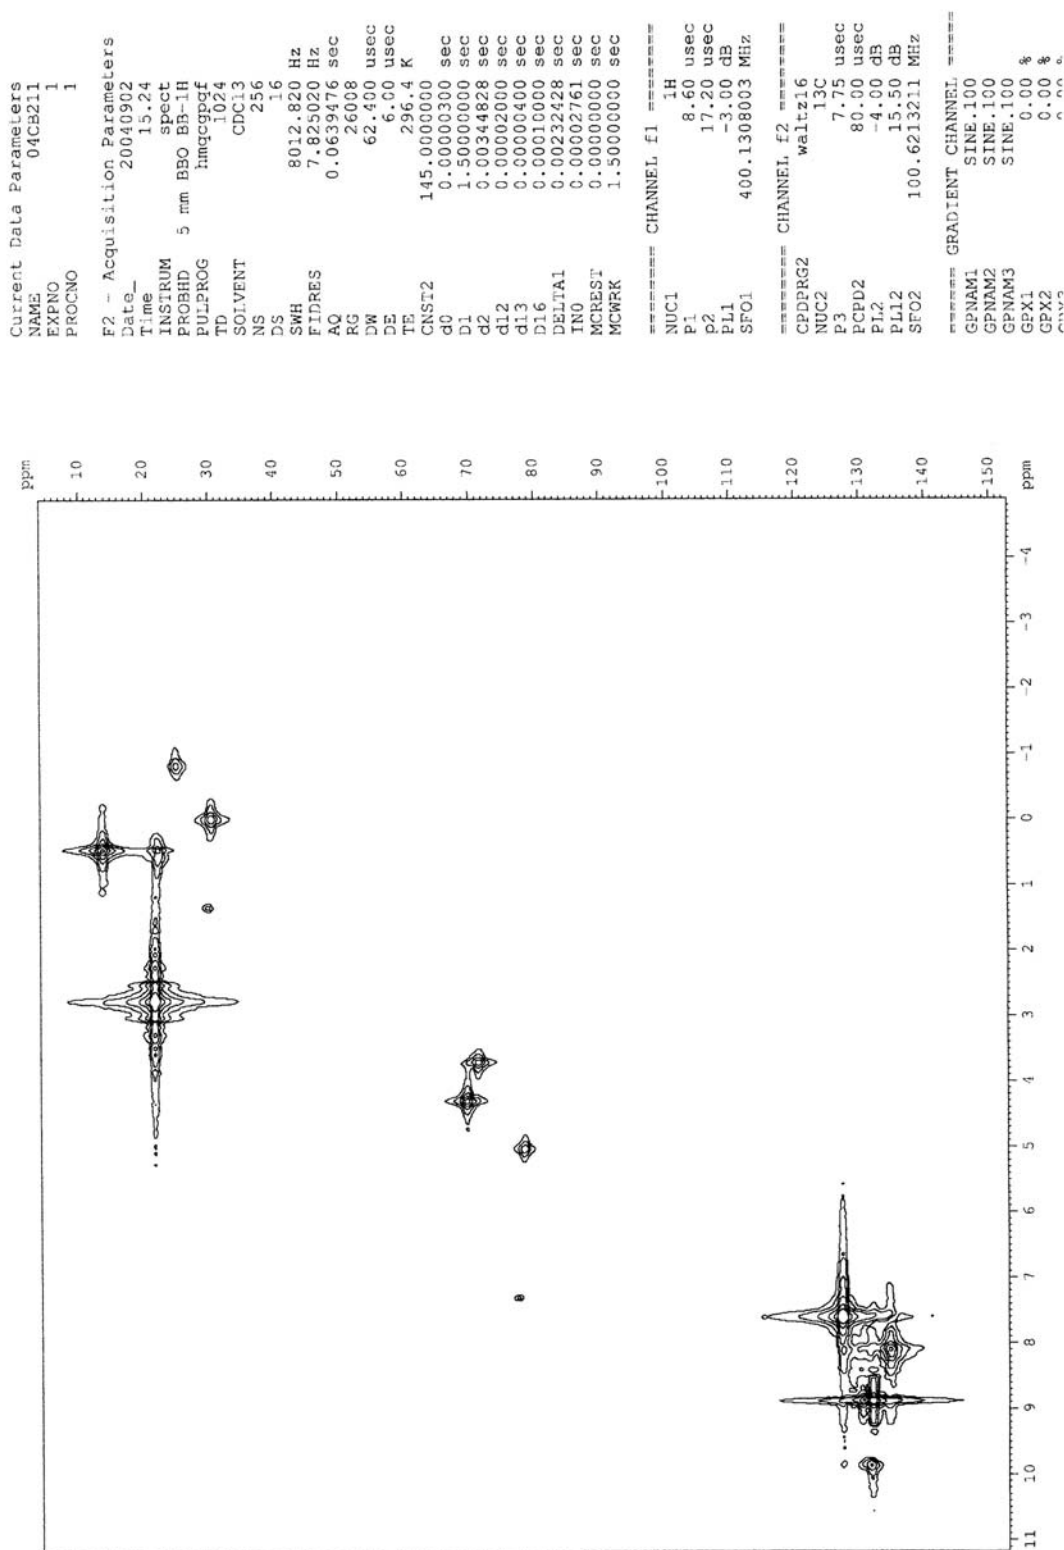

Figure 2: Cosy45 map of **2**,  $6 \leq \delta \leq -3.5$ , 298 K, 250 MHz,  $5 \cdot 10^{-3}$  M in  $\text{CDCl}_3$ . (Grease appears in the  $^1\text{H}$  NMR spectrum as a resonance at 1.3 ppm).

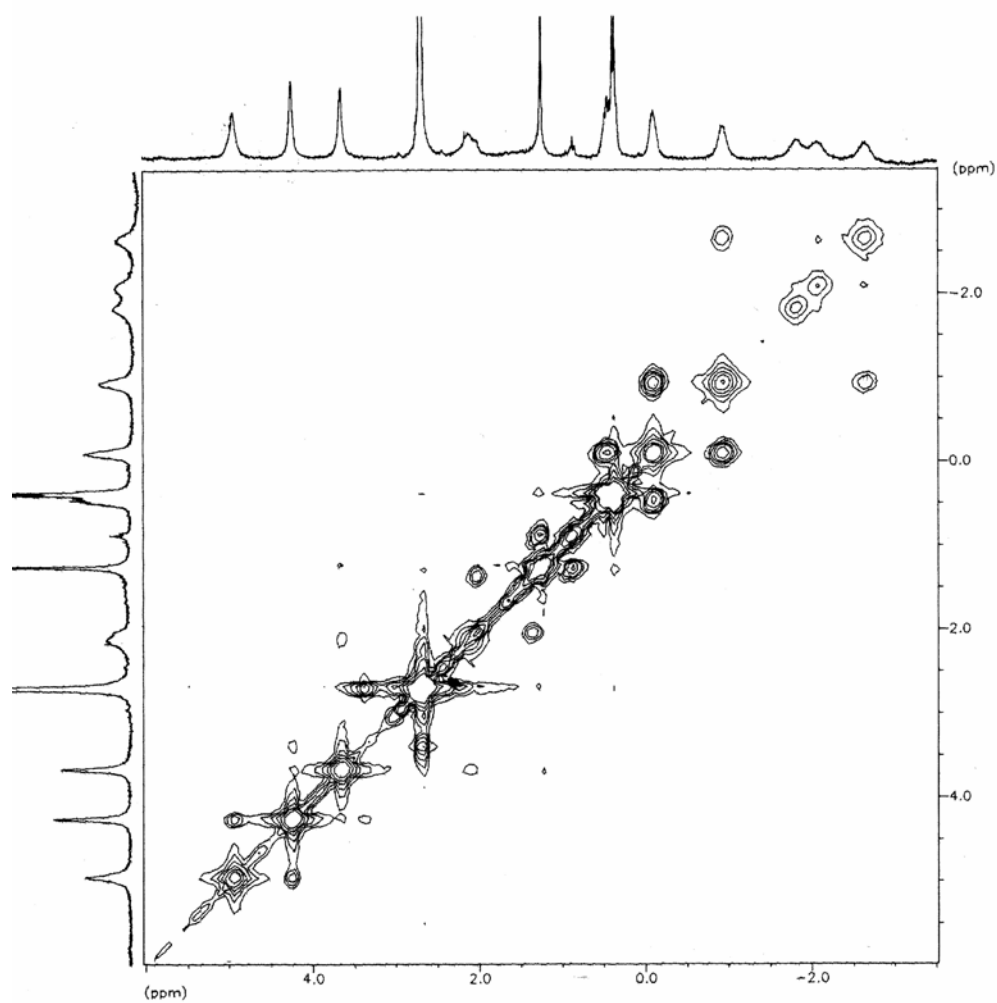

Supplement: b411870g.pdf [file b411870g.pdf]
